# Supplementary material for: Validation of High-sensitivity Flow Cytometry for Reliable Immune Cell Analysis in Real-world Laboratory Settings
Source: PubMed Central journal article supplement — Ann Lab Med. 2023 Jun 30;43(6):620–4. doi: 10.3343/alm.2023.43.6.620 (PMC10345173; doi:10.3343/alm.2023.43.6.620), 2023-06-30
Supplement: alm-43-6-620-supple1.pdf [file alm-43-6-620-supple1.pdf]

**Supplemental Data Table S1.** Sample stability at room temperature at each time point

| Time point              | Tfh cells | Tfh1 cells | Tfh2 cells | Tfh17 cells |
|-------------------------|-----------|------------|------------|-------------|
| Sample-1                |           |            |            |             |
| 4 hr                    | 14.9      | 1.6        | 17.5       | 26.2        |
| 24 hr                   | -16.7     | -25.8      | -7.5       | -12.3       |
| 28 hr                   | -0.9      | -19.4      | -2.5       | 9.2         |
| 48 hr                   | -5.8      | -27.4      | -2.5       | -6.2        |
| Sample-1 with TransFfix |           |            |            |             |
| 4 hr                    | 2.2       | 0.0        | 7.4        | 5.3         |
| 24 hr                   | -5.2      | -30.8      | -17.3      | -12.3       |
| 28 hr                   | 6.4       | -15.8      | -2.5       | -6.1        |
| 48 hr                   | -8.1      | -29.2      | -12.4      | -15.8       |

Relative difference (%) compared with the reference value at 0 hour.  
Abbreviations: Tfh, follicular helper T; Th1, type 1 follicular helper T; Th2, type 2 follicular helper T; Th17, type 17 follicular helper T.
